# Supplementary material for: Integrated single-cell analysis unveils diverging immune features of COVID-19, influenza, and other community-acquired pneumonia
Source: eLife. 2021 Aug 23;10:e69661. doi: 10.7554/eLife.69661 (PMC8382293; doi:10.7554/eLife.69661)
Supplement: Supplementary file 1. [file elife-69661-supp1.xlsx]

## Sheet: individual_patient_tbl
	COV-1	COV-2	COV-3	COV-4	COV-5	COV-6	COV-7	COV-8	CAP-1	CAP-2	CAP-3	CAP-4	CAP-5	Flu-1	Flu-2	Flu-3	C-1	C-2	C-3	C-4
DEMOGRAPHICS
Age (years)	64	48	63	72	75	75	75	63	72	89	75	77	48	61	58	87	70	73	74	72
Sex (male)	Male	Male	Female	Male	Male	Female	Female	Male	Female	Female	Male	Female	Male	Male	Male	Male	Female	Male	Male	Female
Body mass index	30.7	29.6	32.8		28.7	38.1	44.6	25.2	41.1	19.3	24.0	24.2	22.5	14.9	23.2	21.3	23.7	32.0	26.5	20.4
Race	White	Black	Black	White	White	Black	White	Black	White	White	White	White	Black	White	White	White	White	White	White	White
CHRONIC COMORBIDITIES
COPD									Yes		Yes			Yes
Asthma										Yes					Yes
Hypertension	Yes	Yes				Yes		Yes	Yes	Yes					Yes			Yes
History of myocardial infarction										Yes						Yes
History of stroke					Yes														Yes
Diabetes mellitus, type 2	Yes	Yes						Yes	Yes									Yes
Chronic kidney disease														Yes				Yes
CHRONIC MEDICATIONS
Inhaled corticosteroids										Yes	Yes
Low-dose oral corticosteroids1															Yes
ACE-inhibitor/AT-II antagonist	Yes	Yes				Yes		Yes		Yes					Yes	Yes		Yes
Statins	Yes				Yes			Yes								Yes		Yes	Yes	Yes
Platelet aggregation inhibitors	Yes							Yes		Yes								Yes	Yes
LABORATORY TESTS
Platelets (x109/L)	252	345	232	471	110	344	190	327	324	332	278	277	285	458	235	162
Leukocytes (x109/L)	7.1	3.3	7.2	5.4	2.6	6.0	6.7	4.9	13.7	14.2	17.4	13.6	15.3	19.5	13.1	6.0
Neutrophils (x109 /L)	5.3	1.5	5.8	3.6	1.7	4.7	5.5	4.2	9.5		15.5	11.7	12.0	17.9	11.3	5.3
Lymphocytes (x109/L)	1.3	1.5	0.8	1.0	0.8	0.9	0.6	0.4	3.1		1.0	1.4	1.3	0.6	1.1	0.5
Neutrophil-to-lymphocyte ratio	4.0	1.0	7.1	3.5	2.3	5.3	8.6	10.5	3.1		15.5	8.4	9.2	32.6	10.3	10.6
SEVERITY SCORES2
Modified Early Warning Score	5	4	5	2	1	3	4	3	6	4	4	2	3	3	4	3
Pneumonia Severity Index	3	2	2	3	3	4	3	2	3	3	5	4	1	5	2	5
CURB-65	0	0	0	1	1	2	1	2	1	1	2	1	0	1	0	3
qSOFA	1	0	0	1		1	1	0	1	0	1		1	0	0	1
PATHOGEN
SARS-CoV-2 (PCR)	Yes	Yes	Yes	Yes	Yes	Yes	Yes	Yes
Influenza A (PCR)														Yes	Yes	Yes
Streptococcus pneumoniae (blood culture)																Yes
Haemophilus influenzae (sputum culture)									Yes
DISEASE COURSE
Symptoms to admission (days)	10	8	14	7	10	2	14	14	9	4	2	3	6	2	4	3
Hospital length of stay (days)	3	1	4	2	3	6	5	4	5	3	3	2	3	8	2	3
28-day mortality	No	No	No	No	No	Yes	No	No	No	No	No	No	No	No	No	No
ACE = angiotensin-converting enzyme; AT-II = angiotensin II; CAP = community-acquired pneumonia; CURB-65 = confusion, blood urea nitrogen, respiratory rate, blood pressure, age 65 or older;
COPD = chronic obstructive pulmonary disease; qSOFA = quick sequential organ failure assessment score; PCR = polymerase chain reaction; SARS-CoV-2 = severe acute respiratory syndrome coronavirus 2.
1 Corticosteroids <7.5mg prednisolone/day
2 Measured upon presentation to the emergency department
