# Supplementary material for: Integrated single-cell analysis unveils diverging immune features of COVID-19, influenza, and other community-acquired pneumonia
Source: eLife. 2021 Aug 23;10:e69661. doi: 10.7554/eLife.69661 (PMC8382293; doi:10.7554/eLife.69661)
Supplement: Supplementary file 2. [file elife-69661-supp2.xlsx]

## Sheet: Blad1
Antibody list
Catalog Number	Name	Clone	Barcode sequence	Manufacturer
366633	TotalSeq™-C0052 anti-human CD33	P67.6		Biolegend
323053	TotalSeq™-C0392 anti-human CD15 (SSEA-1)	W6D3		Biolegend
399903	TotalSeq™-C Human TBNK Cocktail:			Biolegend
	CD19	HIB19		Biolegend
	CD3	UCHT1		Biolegend
	CD16	3G8		Biolegend
	CD4	RPA-T4		Biolegend
	CD11c	S-HCL-3		Biolegend
	CD56	5.1H11		Biolegend
	CD14	M5E2		Biolegend
	CD8	SK1		Biolegend
	CD45	2D1		Biolegend
304163	TotalSeq™-C0063 anti-human CD45RA	HI100		Biolegend
302853	TotalSeq™-C0154 anti-human CD27	O323		Biolegend
329963	TotalSeq™-C0088 anti-human CD279 (PD-1)	EH12.2H7		Biolegend
307663	TotalSeq™-C0159 anti-human HLA-DR	L243		Biolegend
394661	TotalSeq™-C0251 anti-human Hashtag 1	LNH-94	GTCAACTCTTTAGCG	Biolegend
394663	TotalSeq™-C0252 anti-human Hashtag 2	LNH-94	TGATGGCCTATTGGG	Biolegend
394667	TotalSeq™-C0254 anti-human Hashtag 4	LNH-94	AGTAAGTTCAGCGTA	Biolegend
394671	TotalSeq™-C0256 anti-human Hashtag 6	LNH-94	GGTTGCCAGATGTCA	Biolegend
394673	TotalSeq™-C0257 anti-human Hashtag 7	LNH-94	TGTCTTTCCTGCCAG	Biolegend
352327	TotalSeq™-C0831 anti-human CD138 (Syndecan-1)	DL-101		Biolegend
301359	TotalSeq™-C0161 anti-human CD11b	ICRF44		Biolegend
369621	TotalSeq™-C0151 anti-human CD152 (CTLA-4)	BNI3		Biolegend
356637	TotalSeq™-C0410 anti-human CD38	HB-7		Biolegend
351356	TotalSeq™-C0390 anti-human CD127 (IL-7Rα)	A019D5		Biolegend
