# Supplementary material for: Integrated single-cell analysis unveils diverging immune features of COVID-19, influenza, and other community-acquired pneumonia
Source: eLife. 2021 Aug 23;10:e69661. doi: 10.7554/eLife.69661 (PMC8382293; doi:10.7554/eLife.69661)
Supplement: Supplementary file 3. [file elife-69661-supp3.csv]

ID	1109	1112	1123	1128	1129	1130	1132	1134	1139	2054	2056	2057	2061	3036	3037	3038	3041	3050	3059	7005
Median	876	1063	959	858	745	907	945	756,5	730,5	863	806	677	742	917,5	820,5	904	634	820	839	642
Read numbers	2618	2788,5	2827	2317	1990	2661	2645	2050	1943	2936	2762,5	1832,5	2477	2948	2819,5	2883	1875	2332,5	2320	2049,5
Percentage Mitochondria	6,956983537	4,575157624	3,661309094	3,900536324	5,036373811	4,025508171	4,028441545	6,23951125	5,351996456	5,547204671	6,199636284	8,13815907	5,314009662	7,135138459	5,036573817	6,052193226	7,413419913	6,321693786	4,606172271	6,121820579
